# Supplementary material for: Mesoporous FeP/RGO nanocomposites as anodes for sodium ion batteries with enhanced specific capacity and long cycling life
Source: Royal Society of Chemistry journal article supplement (doi:10.1039/c9nj06091j), 2020-01-01
Supplement: c9nj06091j1.pdf [file c9nj06091j1.pdf]

## Supporting Information

# Mesoporous FeP/RGO nanocomposites as anodes for sodium ion battery with enhanced specific capacity and long cycling life

Qun Li,<sup>a,b</sup>Jianjun Yuan,<sup>\*a</sup> Qinglong Tan,<sup>b</sup> Guixiang Wang,<sup>b</sup> Shuai Feng<sup>\*b</sup>, Qing Liu<sup>c</sup> and Qingzhao Wang<sup>a</sup>

<sup>a</sup> College of Mining and Safety Engineering, Shandong University of Science and Technology, Qingdao, 266590, P. R. China; E-mail: [yjj502@126.com](mailto:yjj502@126.com)

<sup>b</sup> College of Chemistry and Chemical Engineering, Taishan University, Tai'an 271021, P. R. China; E-mail: [hffsh.1982@163.com](mailto:hffsh.1982@163.com)

<sup>c</sup> College of Chemical and Environmental Engineering, Shandong University of Science and Technology, Qingdao, Shandong, 266590, PR China

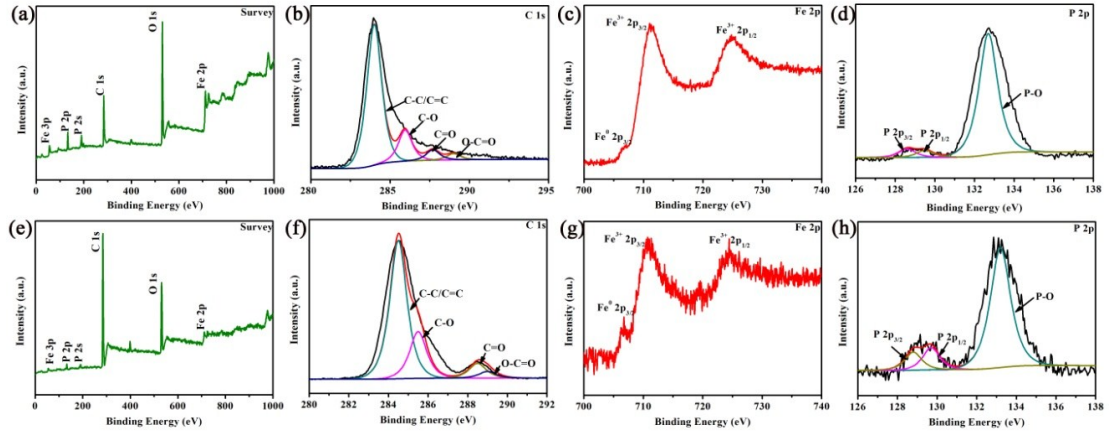

**Fig. S1.** (a) XPS survey spectrum, (b-d) high-resolution XPS spectrum of C 1s, Fe 2p, and P 2p peaks of FeP/RGO-1 sample, (e) XPS survey spectrum, (f-h) high-resolution XPS spectrum of C 1s, Fe 2p, and P 2p peaks of FeP/RGO-3 sample

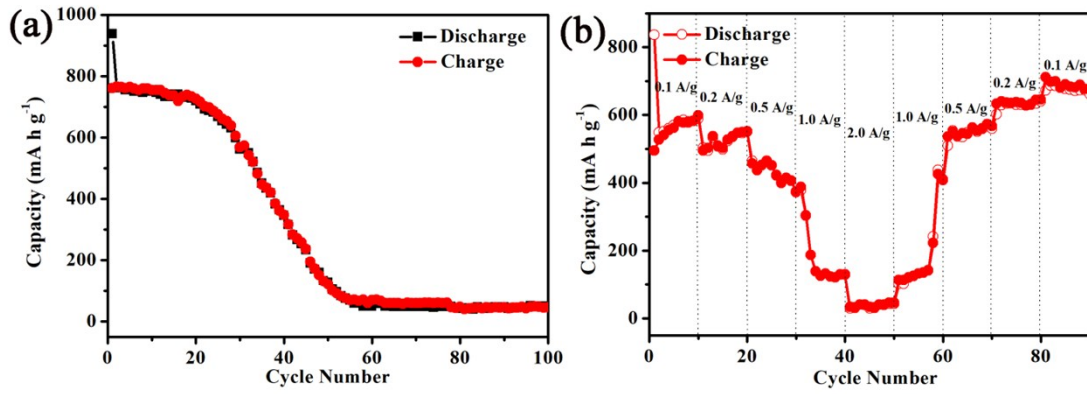

**Fig. S2.** (a) Cycling performance and (b) rate capability of the pure FeP electrode.

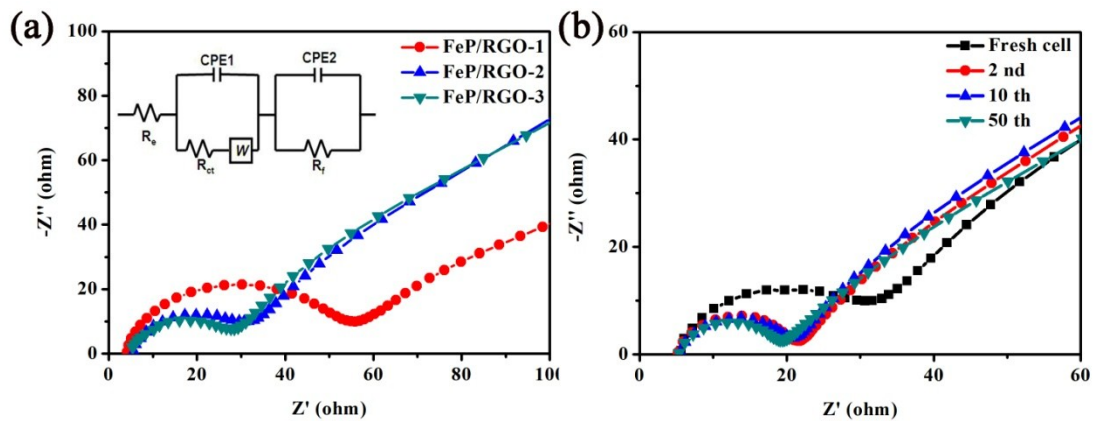

**Fig. S3.** (a) Nyquist plot of the FeP/RGO hybrid samples before cycling and (b) Nyquist plot of the FeP/RGO-2 hybrid sample after different cycles at full charged state.

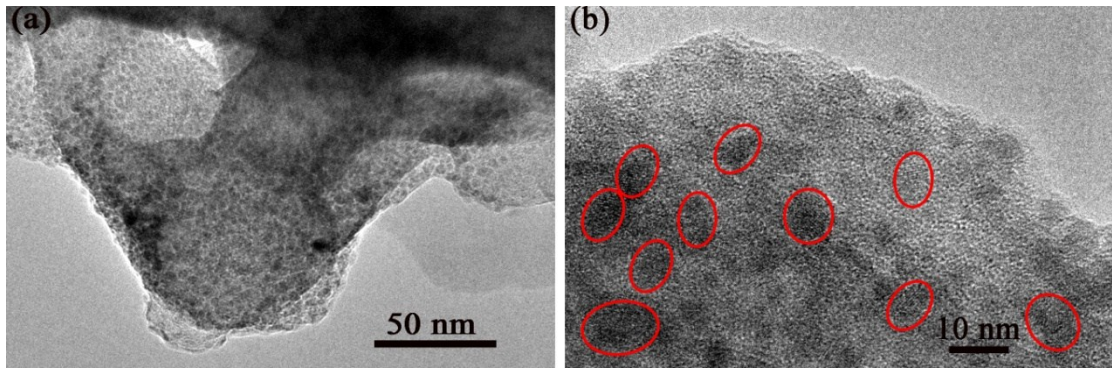

**Fig. S4.** Ex-TEM images of the FeP/RGO-2 electrode after 100 cycles.

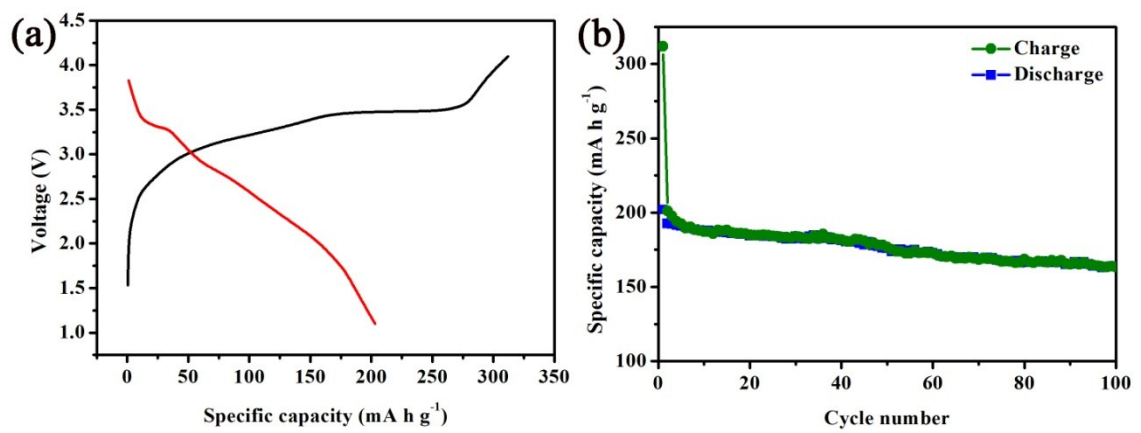

**Fig. S5.** (a) The discharge/charge profiles of  $\text{Na}_3\text{V}_2(\text{PO}_4)_3 // \text{FeP/RGO}$  full cell between 1.0 - 4.0 V. (b) The cycling performance of  $\text{Na}_3\text{V}_2(\text{PO}_4)_3 // \text{FeP/RGO}$  full cell at the current density of  $0.1 \text{ A g}^{-1}$ .
